# Supplementary material for: Controlling the magic size of white light-emitting CdSe quantum dots
Source: Royal Society of Chemistry journal article supplement (doi:10.1039/c8nr01455h), 2018-01-01
Supplement: c8nr01455h1.pdf [file c8nr01455h1.pdf]

## Supporting information for "Controlling Magic Size of White Light-emitting CdSe Quantum Dots"

Sheng Dai<sup>1</sup>, Yu-Sheng Su<sup>2</sup>, Shu-Ru Chung<sup>2,\*</sup>, Kuan-Wen Wang<sup>1,3,\*</sup>, and Xiaoqing  
Pan<sup>1,4,\*</sup>

<sup>1</sup> Department of Chemical Engineering and Materials Science, University of  
California-Irvine, Irvine, California 92697, United States

<sup>2</sup> Department of Materials Science and Engineering, National Formosa University,  
No. 64, Wun Hua Road, Huwei Township, Yunlin County, 63201, Taiwan

<sup>3</sup> Institute of Materials Science and Engineering, National Central University, No.  
300, Zhongda Rd., Zhongli District, Taoyuan City 32001, Taiwan

<sup>4</sup> Department of Physics and Astronomy, University of California-Irvine, Irvine,  
California 92697, United States

\*Corresponding author E-mail: xiaoqing.pan@uci.edu  
srchung@nfu.edu.tw  
kuanwen.wang@gmail.com

**Table S1. Absorption and emission wavelengths and QYs of M-, mix, and R-CdSe prepared at 160-220 °C.**

| Reaction temperature | Samples | Absorption peak (nm) |                 | Emission peak (nm) |                 | QY (%) |
|----------------------|---------|----------------------|-----------------|--------------------|-----------------|--------|
|                      |         | 1 <sup>st</sup>      | 2 <sup>nd</sup> | 1 <sup>st</sup>    | 2 <sup>nd</sup> |        |
| 160 °C               | M       | 403                  | -               | 438/537            | -               | 58     |
|                      | mix     | 403                  | 500             | 438                | 513             | 40     |
|                      | R       | -                    | 511             | -                  | 537             | 3      |
| 180 °C               | M       | 403                  | -               | 438/528            | -               | 42     |
|                      | mix     | 403                  | 508             | 440                | 525             | 37     |
|                      | R       | -                    | 562             | -                  | 574             | 8      |
| 200 °C               | M       | 404                  | -               | 436/533            | -               | 48     |
|                      | mix     | 404                  | 525             | 438                | 537             | 39     |
|                      | R       | -                    | 572             | -                  | 583             | 8      |
| 220 °C               | M       | 404                  | -               | 439/532            | -               | 64     |
|                      | mix     | 404                  | 500             | 440                | 512             | 45     |
|                      | R       | -                    | 573             | -                  | 582             | 6      |

**Table S2. The emission wavelengths and QYs before and after aging for 120 days for M, mix, and R-CdSe samples prepared at 180 °C.**

| Reaction time<br>(min) | Samples | Wavelength (nm) |         | QY (%) |    |
|------------------------|---------|-----------------|---------|--------|----|
|                        |         | A               | B       | A      | B  |
| 2                      | M       | 436             | 436     | 42     | 47 |
| 4                      | mix     | 436/533         | 440/525 | 37     | 42 |
| 60                     | R       | 574             | 574     | 8      | 6  |

A: as-prepared; B: aging for 120 days

**Table S3. The QYs and device properties of various M samples.**

| Sample | QY<br>(as/purified) | Epoxy in<br>encapsulated<br>material (%) | CIE (x, y)   | CCT (K) | CRI | Efficacy<br>(lm/W) |
|--------|---------------------|------------------------------------------|--------------|---------|-----|--------------------|
| M-160  | 58/35               | 0                                        | (0.44, 0.44) | 3140    | 77  | 0.31               |
|        |                     | 50                                       | (0.34, 0.34) | 5200    | 88  | 2.00               |
| M-180  | 42/31               | 0                                        | (0.50, 0.43) | 2020    | 83  | 0.45               |
|        |                     | 50                                       | (0.31, 0.34) | 6460    | 85  | 0.70               |
| M-200  | 48/34               | 0                                        | (0.40, 0.40) | 3700    | 89  | 0.81               |
|        |                     | 50                                       | (0.42, 0.45) | 3608    | 80  | 1.86               |
| M-220  | 64/39               | 0                                        | (0.43, 0.42) | 3170    | 88  | 0.56               |
|        |                     | 50                                       | (0.29, 0.31) | 8350    | 84  | 1.28               |

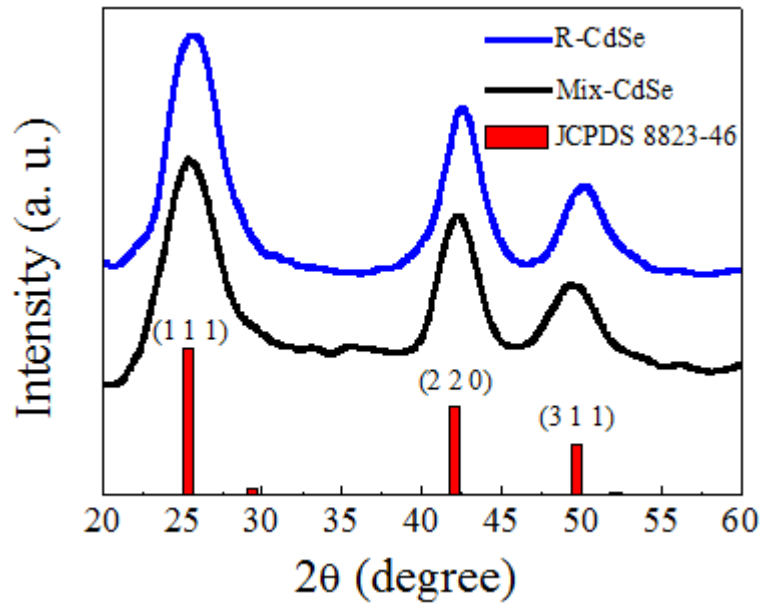

Figure S1. XRD patterns of R- and Mix-CdSe QDs.

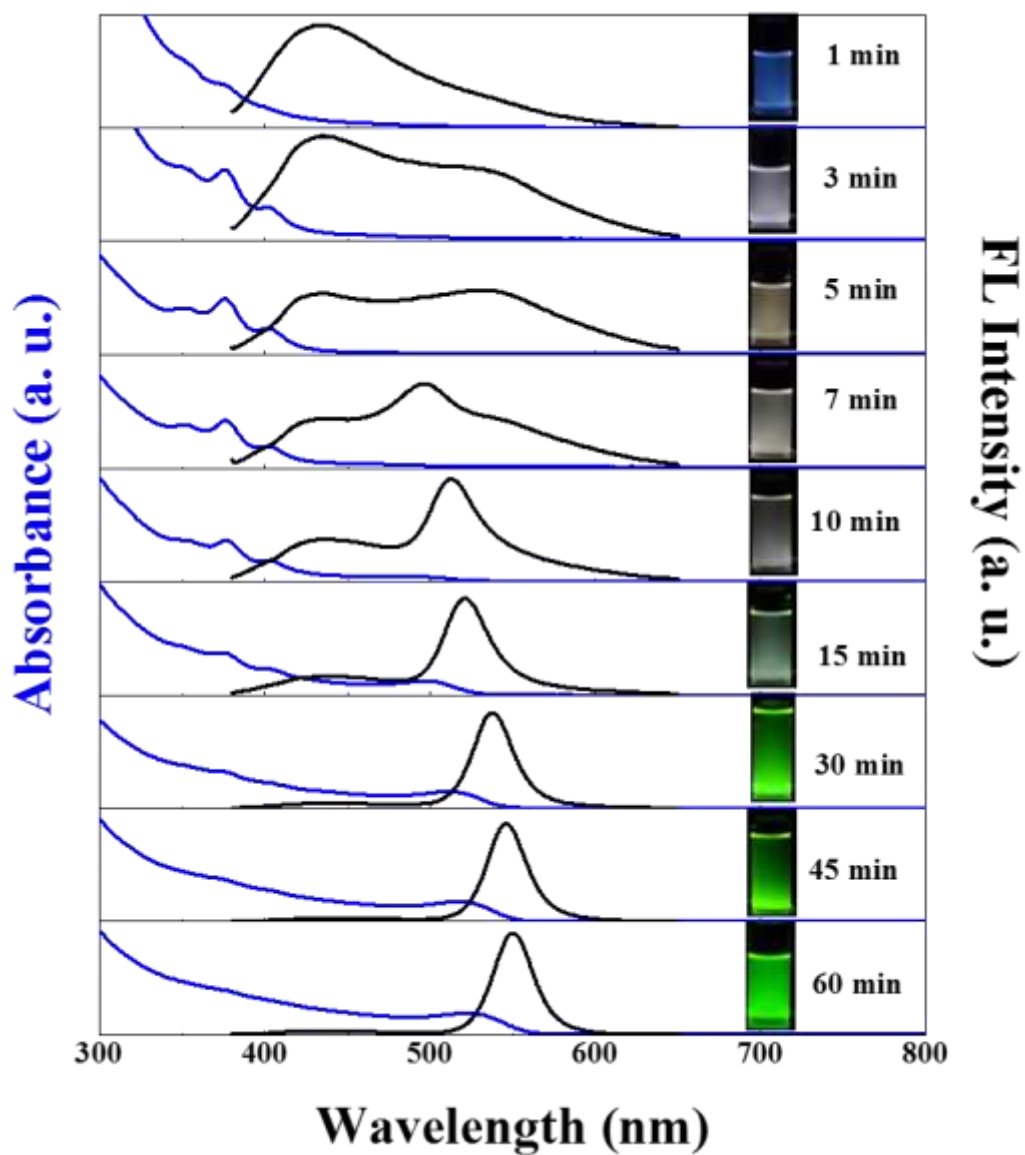

Figure S2. The temporal evolution of UV-Vis and FL spectra of samples prepared at 160 °C.

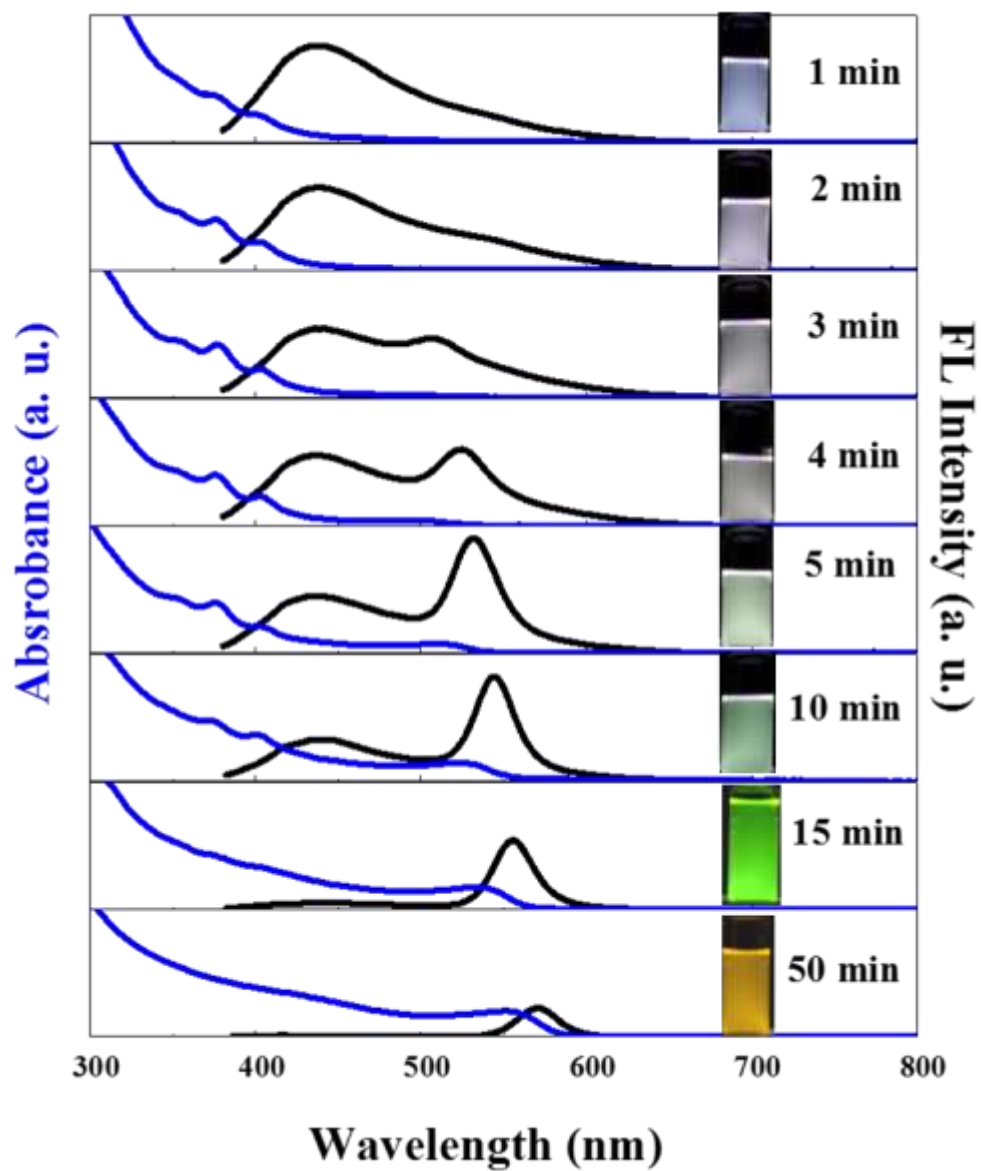

**Figure S3.** The temporal evolution of UV-Vis and FL spectra of samples prepared at 180 °C.

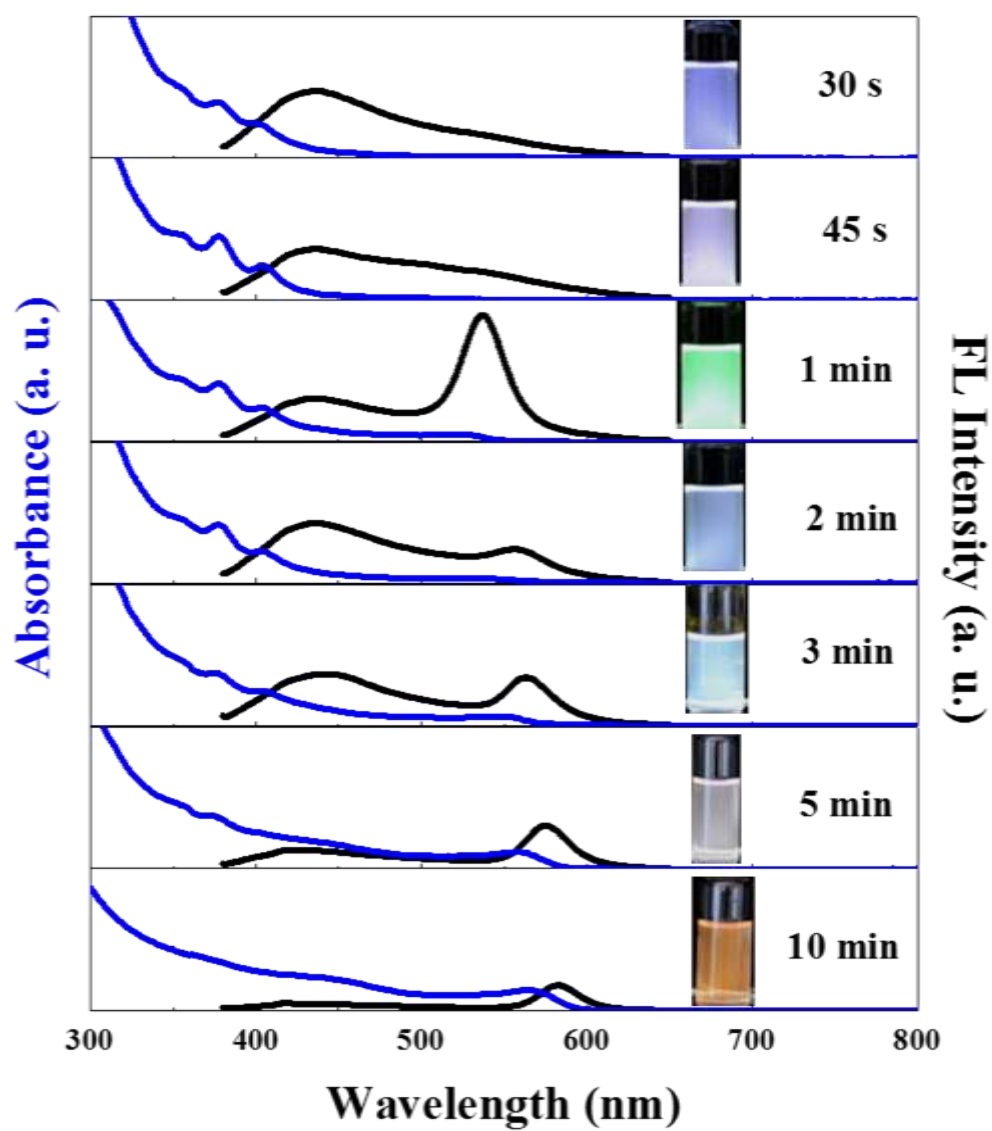

Figure S4. The temporal evolution of UV-Vis and FL spectra of samples prepared at 200 °C.



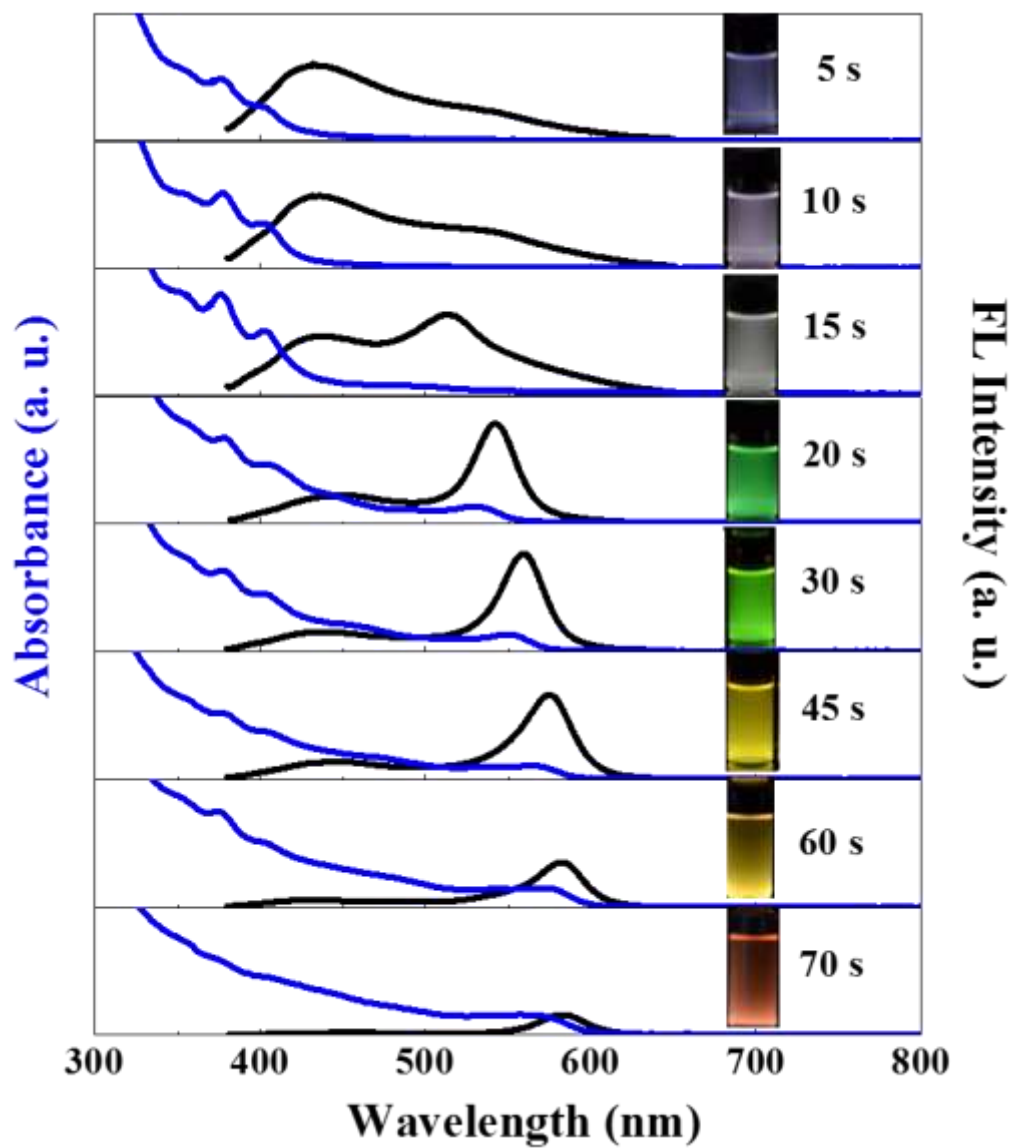

Figure S5. The temporal evolution of UV-Vis and FL spectra of samples at 220 °C.

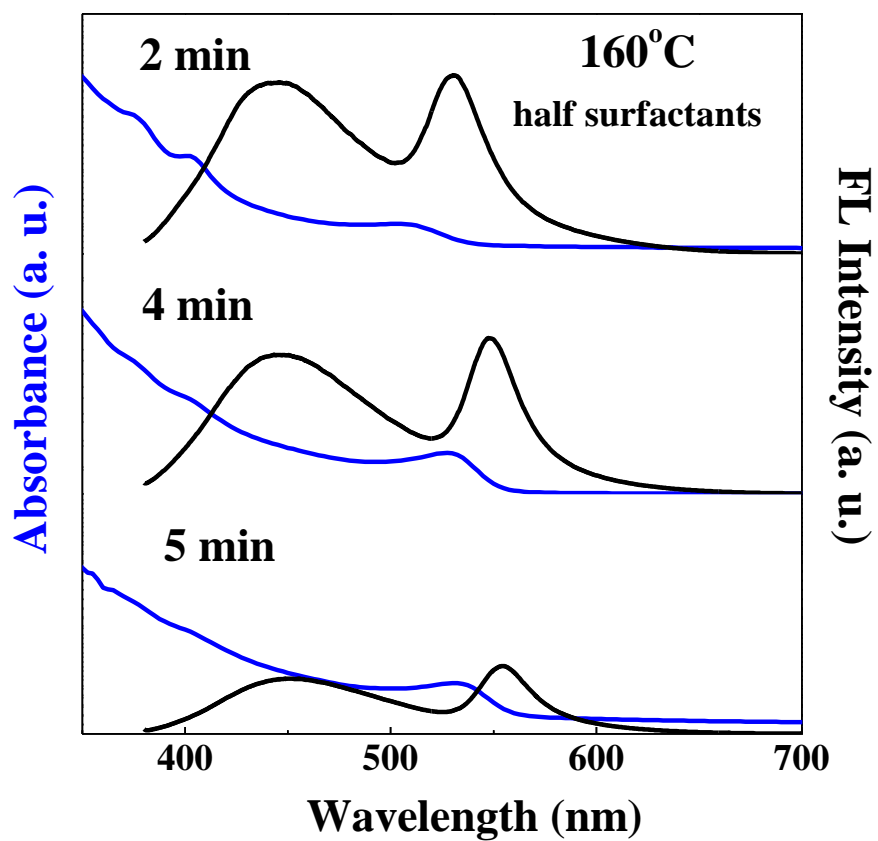

**Figure S6.** The temporal evolution of UV-Vis and FL spectra of samples at 160 °C with half of HDA and ODE.

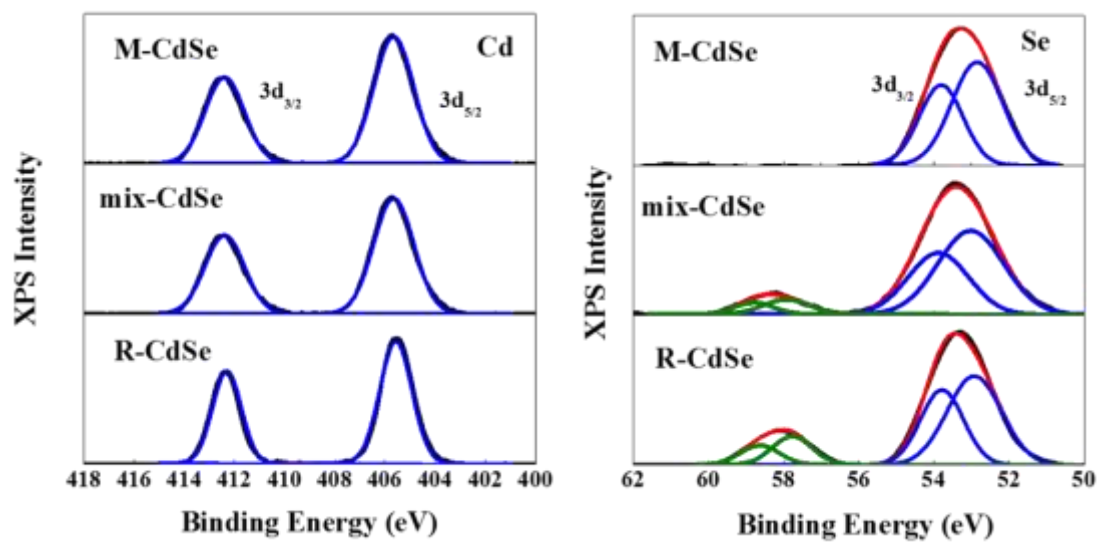

Figure S7. The XPS spectra of M-, mix, and R-CdSe prepared at 180 °C.

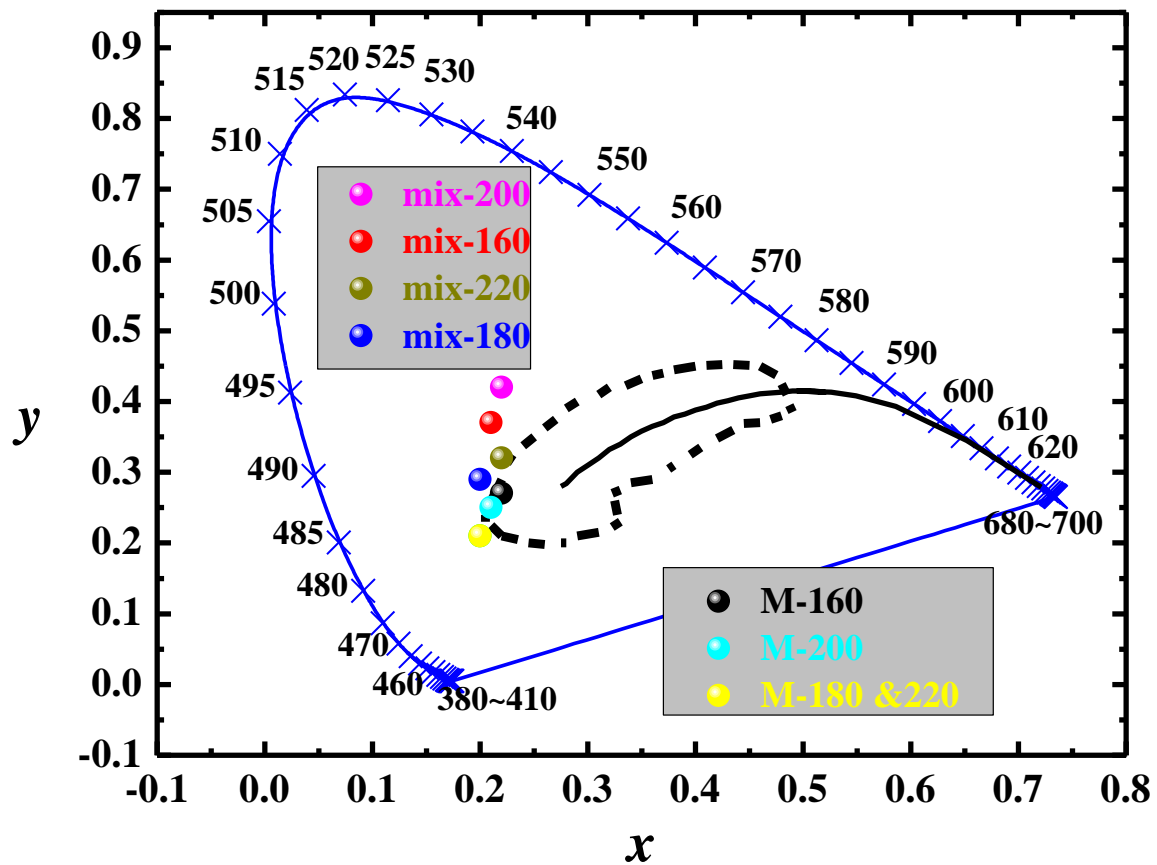

Figure S8. The CIE of the M- and mix- CdSe prepared at 160-220 °C.
